# Supplementary material
Source: HighWire-hosted journal article supplement (https://srh.bmj.com/content/47/3/e6)
Supplement: inline-supplementary-material-2 [file inline-supplementary-material-2.pdf]

**Supplemental Table 2. Additional Knowledge, Attitudes, and Preferences of HIV and PrEP.**

| <i>Supplemental Table 2. Additional Knowledge, Attitudes, and Preferences of HIV and PrEP.</i>                                           |                          |                         |
|------------------------------------------------------------------------------------------------------------------------------------------|--------------------------|-------------------------|
| <i>HIV Knowledge</i>                                                                                                                     |                          |                         |
|                                                                                                                                          |                          | n (%) or median (Q1-Q3) |
| "HIV can be transmitted in the following ways..." (n=198)                                                                                |                          |                         |
|                                                                                                                                          | Sex                      | 192 (97.0)              |
|                                                                                                                                          | Sharing needles          | 180 (90.9)              |
|                                                                                                                                          | Pregnancy/childbirth     | 105 (53.0)              |
|                                                                                                                                          | Sharing a drinking glass | 26 (13.1)               |
|                                                                                                                                          | Kissing on the cheek     | 8 (4.0)                 |
|                                                                                                                                          | Using public toilets     | 27 (13.6)               |
| "You can tell if someone has HIV just by looking at them." (n=194)                                                                       |                          |                         |
|                                                                                                                                          | True                     | 2 (1.0)                 |
|                                                                                                                                          | False                    | 192 (99.0)              |
| "There are medications that can cure HIV." (n=193)                                                                                       |                          |                         |
|                                                                                                                                          | True                     | 32 (16.6)               |
|                                                                                                                                          | False                    | 161 (83.4)              |
| "Having sex with someone who is HIV+ and on treatment with an undetectable viral load does not put you at risk for getting HIV." (n=192) |                          |                         |
|                                                                                                                                          | Yes                      | 30 (15.6)               |
|                                                                                                                                          | No                       | 162 (84.4)              |
| <i>PrEP Knowledge</i>                                                                                                                    |                          |                         |
| "To the best of your knowledge, which STI(s) does PrEP protect against?" (n=198)                                                         |                          |                         |
|                                                                                                                                          | Chlamydia                | 40 (20.2)               |
|                                                                                                                                          | HIV                      | 155 (78.3)              |
|                                                                                                                                          | Gonorrhea                | 34 (17.2)               |
|                                                                                                                                          | Syphilis                 | 28 (14.1)               |
|                                                                                                                                          | Genital warts            | 20 (10.1)               |
|                                                                                                                                          | Genital herpes           | 19 (9.6)                |
| Where Did You Hear About PrEP? (n=31)*                                                                                                   |                          |                         |
|                                                                                                                                          | Advertisement            | 10 (32.3)               |
|                                                                                                                                          | Friend/Family            | 6 (19.4)                |
|                                                                                                                                          | Online/Social Media      | 9 (29.0)                |
|                                                                                                                                          | Medical Provider         | 5 (16.1)                |
|                                                                                                                                          | HIV Counselor            | 2 (6.5)                 |
|                                                                                                                                          | Somewhere Else           | 9 (29.0)                |
| <i>PrEP Attitudes** (1=strongly agree, 5=strongly disagree)</i>                                                                          |                          |                         |

|                                                                                                                          |            |
|--------------------------------------------------------------------------------------------------------------------------|------------|
| "When on PrEP, I don't need to use condoms." (n=186)                                                                     | 5 (4-5)    |
| "Taking PrEP means I am putting myself at risk for HIV." (n=189)                                                         | 4 (3-5)    |
| "I think condoms are a better choice than PrEP." (n=192)                                                                 | 3 (3-4)    |
| "People who are on PrEP sleep around." (n=190)                                                                           | 4 (3-5)    |
| "People who are on PrEP are making a smart decision to protect their health." (n=192)                                    | 2 (1-3)    |
| "I would not trust someone who told me they were on PrEP." (n=191)                                                       | 3 (3-4)    |
| "People who are on PrEP use it as an excuse to have sex without a condom." (n=191)                                       | 3 (3-4)    |
| "If I were on PrEP, I'm sure that PrEP would be effective in protecting me for HIV infection." (n=191)                   | 3 (2-3)    |
| <i>PrEP Preferences</i>                                                                                                  |            |
| "What sources would you trust most for information on PrEP?" (n=198)*                                                    |            |
| Friend/Family                                                                                                            | 22 (11.1)  |
| Regular Primary Care Provider                                                                                            | 107 (54.0) |
| Another Doctor or Nurse                                                                                                  | 66 (33.3)  |
| Family Planning Clinic                                                                                                   | 97 (49.0)  |
| Another Clinic or Medical Provider                                                                                       | 53 (26.8)  |
| Internet/Social Media                                                                                                    | 26 (13.1)  |
| HIV Prevention Organization                                                                                              | 87 (43.9)  |
| Somewhere Else                                                                                                           | 11 (5.6)   |
| "If you were to decide to take PrEP, which of the following are concerns that you have related to taking PrEP?" (n=198)* |            |
| Side Effects                                                                                                             | 134 (67.7) |
| That PrEP may interact with a medication I am already taking                                                             | 29 (14.7)  |
| Having to take a pill once a day                                                                                         | 50 (25.3)  |
| Might make me more likely to have sex without a condom                                                                   | 8 (4.0)    |
| My partner would be angry                                                                                                | 18 (9.1)   |
| People would think I have HIV                                                                                            | 26 (13.1)  |
| Having to talk to a medical provider about my sex life                                                                   | 8 (4.0)    |
| I will not be able to afford the cost                                                                                    | 43 (21.7)  |
| I would not know where to go to get PrEP                                                                                 | 29 (14.7)  |
| I am too busy with childcare                                                                                             | 6 (3.0)    |
| I want to become pregnant in the near future                                                                             | 11 (5.6)   |
| I have no concerns                                                                                                       | 32 (16.2)  |
| Other                                                                                                                    | 6 (3.0)    |

| "Where would you prefer to regularly get PrEP medications?" (n=192) |                                  |            |
|---------------------------------------------------------------------|----------------------------------|------------|
|                                                                     | My regular primary care provider | 110 (57.3) |
|                                                                     | Family Planning Clinic           | 33 (17.2)  |
|                                                                     | STI clinic                       | 5 (2.6)    |
|                                                                     | Pharmacy                         | 30 (15.6)  |
|                                                                     | Abortion Clinic                  | 4 (2.1)    |
|                                                                     | Somewhere else                   | 10 (5.2)   |

\*response is "choose all that apply," will sum to greater than 100%

\*\*response is scale of 1-5, where 1=strongly agree, 5=strongly disagree

\*\*\*STI = sexually-transmitted infection

*Questions have variable response rates as participation with each question was voluntary and participants could opt not to respond.*
